# Supplementary material
Source: Springer Nature journal article supplement (https://www.springermedizin.de/resource/supplementary/12960_2008_180_MOESM6_ESM.pdf/9570584)

## Salaries (R\$)

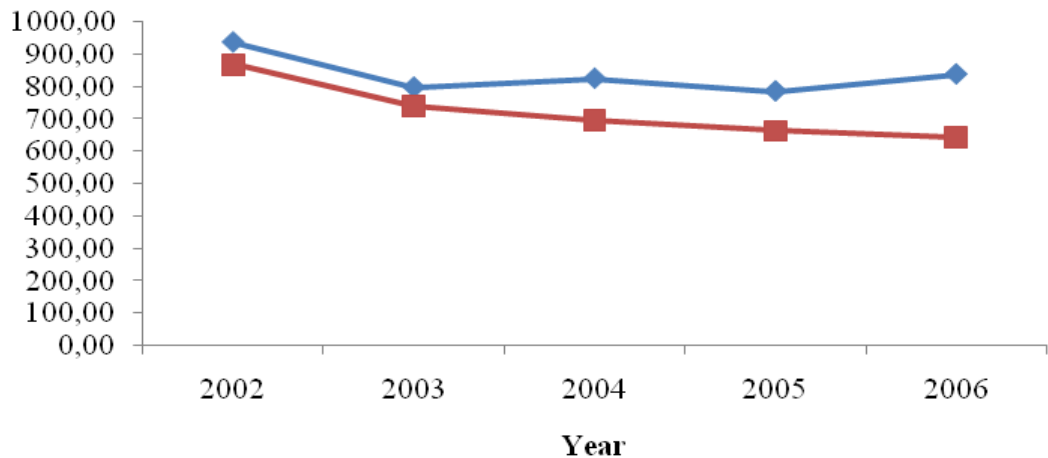

—◆— Permanent Dentist

—■— Non Permanent Dentist

Supplement: MOESM6 [file 9570584]
